1                                   **Complex interbacterial interactions in mixed biofilms**  
2                                   **as a key determinant of their antimicrobial treatment efficacy**

3  
4  
5   Airat R. Kayumov<sup>\*1</sup>, Elena Y. Trizna<sup>1</sup>, Maria N. Yarullina<sup>1</sup>, Farida S.Akhatova<sup>1</sup>,  
6   Elvira V. Rozhina<sup>1</sup>, Rawil F. Fakhrullin<sup>1</sup>, Alsu M. Khabibrakhmanova<sup>2</sup>,  
7   Almira R. Kurbangalieva<sup>2</sup>, Mikhail I. Bogachev<sup>3</sup>

8  
9  
10   <sup>1</sup>Institute of Fundamental Medicine and Biology, Kazan Federal University,  
11   Kazan, Republic of Tatarstan, Russian Federation  
12

13   <sup>2</sup>Biofunctional Chemistry Laboratory, A. Butlerov Institute of Chemistry,  
14   Kazan Federal University, Kazan, Republic of Tatarstan, Russian Federation  
15

16   <sup>3</sup>Biomedical Engineering Research Centre, St. Petersburg Electrotechnical University,  
17   St. Petersburg, Russian Federation  
18

19  
20  
21  
22  
23   \* Corresponding author  
24   E-mail: kairatr@yandex.ru  
25  
26

## 27           **Abstract**

28           Biofilms are formed by closely adjacent microorganisms embedded into an extracellular  
29 matrix this way providing them with strong protection from antimicrobials, which is often  
30 further reinforced in polymicrobial biofilms. Despite of the well-known antagonistic interactions  
31 between *S. aureus* and *P. aeruginosa*, the most common pathogens causing various nosocomial  
32 infections, they often form mixed consortia characterized by increased pathogenicity and delayed  
33 recovery in comparison with single species infections. Here we show that, while *S. aureus* could  
34 successfully avoid a number of antimicrobials by embedding into the biofilm matrix of *P.*  
35 *aeruginosa* despite of their antagonism, the very same consortium was characterized by 10–fold  
36 higher susceptibility to broad-spectrum antimicrobials compared to monocultures. Moreover,  
37 quantitatively similar increase in antimicrobials susceptibility could be achieved when  
38 *P. aeruginosa* was introduced into *S. aureus* biofilm, compared to *S. aureus* monoculture. In a  
39 reverse experiment, intervention of *S. aureus* into the mature *P. aeruginosa* biofilm significantly  
40 increased the efficacy of ciprofloxacin against *P. aeruginosa*. A broader perspective is provided  
41 by antagonistic bacteria intervention into already preformed monoculture biofilms leading to the  
42 considerable enhancement of their antibiotic susceptibility. We believe that this approach has a  
43 strong potential of further development towards innovative treatment of biofilm-associated  
44 infections such as transplantation of the skin residential microflora to the wounds and ulcers  
45 infected with nosocomial pathogens to speed up their microbial decontamination.

46

47



## 49            **Author summary**

50    Biofilms formation is one of the key mechanisms providing pathogenic bacteria with extreme  
51    resistance to antimicrobials. On the *S. aureus* and *P. aeruginosa* mixed culture model we show  
52    explicitly that antimicrobials efficacy against bacteria in mixed biofilms differs considerably  
53    from monoculture biofilms. From the one hand, *S. aureus* avoids vancomycin and ampicillin by  
54    the rearrangements to the lower layers of the *P. aeruginosa* biofilm matrix. On the other hand, in  
55    the same consortium susceptibility to ciprofloxacin and aminoglycosides increases nearly 10–  
56    fold compared to monocultures. This finding allowed suggesting that intervention of antagonistic  
57    bacteria into already preformed monoculture biofilms could be used as an innovative approach to  
58    their treatment by increasing their antibiotic susceptibility. Thus, by introducing *P. aeruginosa*  
59    into preformed *S. aureus* biofilm, susceptibility of *S. aureus* to aminoglycosides was increased 4–  
60    fold, compared to monoculture. The intervention of *S. aureus* into the mature *P. aeruginosa*  
61    biofilm significantly increased the efficacy of ciprofloxacin against *P. aeruginosa*. We believe  
62    that this approach has a strong potential of further development towards innovative treatment of  
63    biofilm-associated infections such as introduction of the skin residential microflora to the  
64    wounds and ulcers infected with nosocomial pathogens to speed up their microbial  
65    decontamination.

## 66 Introduction

67 Bacterial fouling is an important factor that strongly affects acute and chronic wounds  
68 healing. Recent reports indicate that bacterial biofilms prevent wound scratch closure [1].  
69 Besides the physical obstruction of the cells, pathogenic bacteria produce various virulence  
70 factors including toxins and proteases that also affect cytokine production by keratinocytes,  
71 induce apoptosis of the host cells and cause inflammation [2-6].

72 *S. aureus* and *P. aeruginosa* are one of the most widespread pathogenic agents causing  
73 various nosocomial infections, including pneumonia on the cystic fibrosis background,  
74 healthcare associated pneumonia and chronic wounds [7-10]. During infection, bacterial cells are  
75 embedded into a self-produced extracellular matrix of organic polymers this way forming either  
76 mono- or polymicrobial biofilms [11, 12] which drastically reduce their susceptibility to both  
77 antimicrobials and the immune system of the host [13, 14]. Accordingly, interspecies interactions  
78 between *S. aureus* and *P. aeruginosa* within mixed biofilms attracted major attention in recent  
79 years including both *in vitro* [15] and *in vivo* studies [16]. Current data suggests that bacterial  
80 pathogenicity is promoted during polymicrobial infections and recovery is delayed in  
81 comparison with monoculture infections [15-17]. Recently, *P. aeruginosa* was reported to be the  
82 dominant pathogen in *S. aureus*-*P. aeruginosa* mixed infections [16]. *P. aeruginosa* is known as  
83 a common dominator in polymicrobial biofilm-associated infections due to multiple mechanisms  
84 allowing its rapid adaptation to the specific conditions of the host. In particular, *P. aeruginosa*  
85 produces multiple molecules to compete with other microorganisms for space and nutrients.  
86 Therefore, it either strongly reduces or even completely outperforms *S. aureus* during co-culture  
87 *in vitro* in both planktonic and biofilm forms [18-21].

88 While it is known that *S. aureus* and *P. aeruginosa* exhibit rather antagonistic relationship  
89 [22, 23], several studies reported their mutual association in acute and chronic wounds embedded  
90 in a mixed biofilm [8, 24-28], with *S. aureus* typically residing on the wound surface, whereas

91 *P. aeruginosa* being rather observed in the deep layers [15, 28-31]. Interestingly, in mixed  
92 *P. aeruginosa* - *S. aureus* biofilms from cystic fibrosis patients *S. aureus* was shown to be  
93 dominating during childhood, with *P. aeruginosa* prevalence increasing with aging and  
94 worsening patient prognosis [32-34].

95 During the biofilm formation *P. aeruginosa* produces three main exopolysaccharides,  
96 namely alginate, Pel, and Psl, which form an extracellular matrix in the biofilm exhibiting both  
97 structural and protective functions [35-38]. Under prevalent Pel secretion, loose biofilm  
98 structures are formed [39] and thus *S. aureus* is able to penetrate into the biofilm [39]. When  
99 growing in consortium with *P. aeruginosa*, *S. aureus* switches to the small colony variants  
100 (SCVs), a well-characterized phenotype detected in various diseases, including cystic fibrosis  
101 and device-related infections [40-43]. SCVs appear as small, smooth colonies on a culture plate  
102 and grow significantly slower compared to wild type colonies. Remarkably, switch to the SCV  
103 phenotype improves the survival of *S. aureus* under unfavorable conditions, as it exhibits  
104 increased aminoglycoside resistance, biofilm formation, and intracellular survival [40, 43-45].  
105 Prolonged co-culture with *P. aeruginosa* leads to higher proportions of stable *S. aureus* SCVs  
106 that is further increased in the presence of aminoglycosides [43]. It has been recently suggested  
107 that rare observation of *S. aureus* and *P. aeruginosa* together in diagnostic cultures of sputum of  
108 cystic fibrosis patients could be attributed to the existence of *S. aureus* as SCVs that are more  
109 difficult to detect due to their small size and fastidious growth requirements [40, 45].

110 *S. aureus* is a common opportunistic pathogen responsible for the majority of skin  
111 infections resulting in increased morbidity, mortality, and exhibiting increased rise of antibiotic-  
112 resistant strains in the last decades. Investigations on alternative treatment options against  
113 biofilm-associated infections are largely based upon using specialized agents (such as quaternary  
114 ammonium compounds, curcumin or chlorquinaldol) or enzymatic treatment that in  
115 combinations with antibiotics provide high local drug concentrations avoiding systemic adverse  
116 effects [46-52]. While many approaches to targeting staphylococcal biofilms were reported [50,

117 53-57], only few successive ways of targeting *P. aeruginosa* are known [52, 58-60]. Among  
118 various compounds exhibiting anti-biofilm activities, the derivatives of 2(5*H*)-furanone have  
119 been reported to inhibit biofilm formation by *Staphylococci* [61-65]. While many of these  
120 approaches exhibited promising results against staphylococcal monocultures, their efficiency  
121 against polymicrobial biofilms remains questionable.

122 Only few investigations indicated that extracellular polymeric substances forming the  
123 biofilm matrix provide protection against antibiotics to all inhabitants of the biofilm, including  
124 the non-producers, although the biofilm as a whole is weakened [39, 66], this way proposing that  
125 *S. aureus* could potentially survive in the presence of *P. aeruginosa* and even co-exist with it in a  
126 polymicrobial biofilm, benefiting from the antimicrobial barrier formed by the *P. aeruginosa*  
127 matrix components.

128 Here we demonstrate explicitly that *S. aureus* successfully incorporates into the  
129 *P. aeruginosa* biofilm matrix under conditions of staphylococcus-specific treatment and survives  
130 there in presumably SCV-like form. In contrast, the efficiency of broad-spectrum antimicrobials  
131 like ciprofloxacin and aminoglycosides active against both bacterial species in mixed biofilms  
132 increased nearly 10-fold in comparison with corresponding monocultures. These data suggest  
133 that interspecies interactions appear a key determinant that strongly governs the antibiotic  
134 susceptibility in mixed biofilms, the fact that should be taken in account when considering an  
135 optimized strategy of polymicrobial infections treatment.

136

## 137           **Results**

### 138           **Modeling the *S. aureus* – *P. aeruginosa* mixed biofilm**

139           Despite of known antagonistic interactions between *S. aureus* and *P. aeruginosa* [23],  
140 they are still the most common pathogens evoking wound infections and forming mixed biofilms  
141 on their surfaces [25, 26, 28]. We have simulated *in vitro* different situations where either  
142 *S. aureus* in a fresh broth was added to the preformed 24-h old biofilm of *P. aeruginosa* or, vice  
143 versa, *P. aeruginosa* was added to the preformed 24-h old biofilm of *S. aureus*, with cultivation  
144 continued for the next 24 h. As a control, both strains were inoculated simultaneously and grown  
145 for 48 h with the broth exchange after 24 h of cultivation. Both *S. aureus* and *P. aeruginosa* were  
146 able to penetrate into the preformed biofilm of the other bacterium (Fig 1). Irrespective of which  
147 bacterium initially preformed the biofilm and which one was added later, the ratio of their CFUs  
148 in the biofilm after 24 h cultivation remained around 1:10 with the prevalence of the first biofilm  
149 former (Fig 1 A and B), and was 1:1 when both bacteria were inoculated simultaneously (Fig 1  
150 C). Therefore in the following experiments simultaneous inoculation of both bacteria was used to  
151 obtain their mixed biofilm.

152           Next to analyze the biofilm structure and cells distribution in the matrix, the *S. aureus* -  
153 *P. aeruginosa* mixed biofilm was grown in imaging cover slips, stained with ViaGram™ Red<sup>+</sup> to  
154 differentiate between *S. aureus* and *P. aeruginosa* followed by their analysis with confocal laser  
155 scanning microscopy. To estimate the viability of the cells, SYTO9/propidium iodide staining  
156 was also performed, as the ViaGram™ Red<sup>+</sup> staining requires buffer change that disturbs the  
157 biofilm structure. Both *S. aureus* and *P. aeruginosa* formed 20-25 μm-thick biofilms when  
158 growing as monocultures (Fig 2A, B). While the mixed biofilm was of similar thickness, it  
159 appeared more rigid in comparison with monoculture ones (Fig 2C). Interestingly, in the mixed  
160 biofilm, *S. aureus* was distributed unevenly and appeared as cell clumps, apparently as so-called  
161 small colony variants (SCV) embedded in the biofilm matrix (see white arrow in Fig 2C). By



162 using differential staining of *S. aureus* and *P. aeruginosa* (Fig 3) we have also analyzed the  
163 distributions of *S. aureus* (red-stained) and *P. aeruginosa* (blue-stained) over the biofilm layers  
164 and evaluated their relative fractions in each layer. In agreement with earlier data, *S. aureus*  
165 tended to distribute in the upper layers of the biofilm, while *P. aeruginosa* dominated in its lower  
166 layers (see Fig 3A, C). The fraction of non-viable cells in the mixed biofilm was just slightly  
167 higher than in corresponding monoculture biofilms (compare Fig 2 A, B and C and Fig S1),  
168 suggesting stability of *S. aureus* - *P. aeruginosa* consortium under the conditions used.  
169

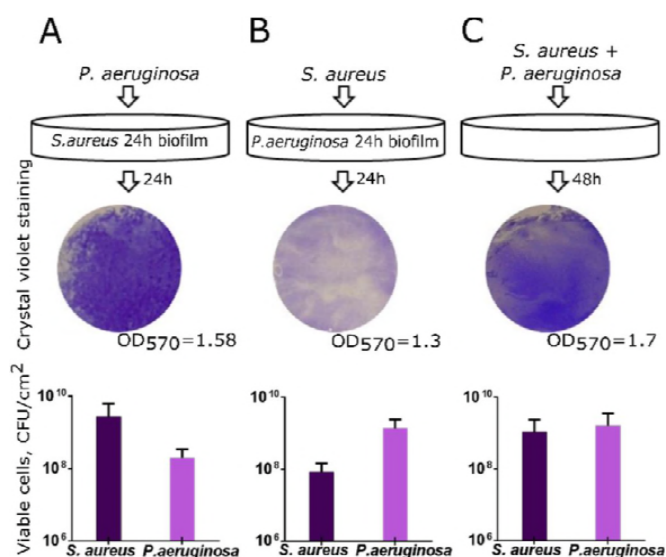

170

171 **Fig 1. *In vitro* simulation of the *S. aureus*-*P. aeruginosa* mixed biofilm formation.**

172 (A) *P. aeruginosa* suspension in a fresh broth was added to the preformed 24-h old biofilm of  
173 *S. aureus* or (B) *S. aureus* was added to the preformed 24-h old biofilm of *P. aeruginosa* and  
174 cultivation was continued for the next 24 h. (C) As a control, both strains were inoculated  
175 simultaneously and were grown for 48 h with the broth exchange after 24 h of cultivation. The  
176 biofilm formation was assessed by crystal violet staining; the number of viable biofilm-  
177 embedded cells was counted by drop plate assay.

178

179

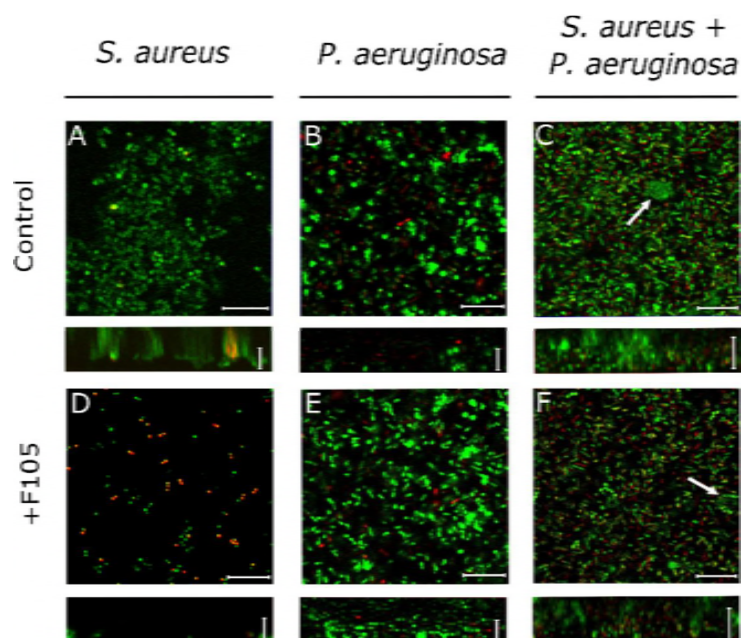

180

181

182 **Fig 2. Mono- and polymicrobial biofilms formed by *S. aureus* and *P. aeruginosa*.**

183 Cells were grown without any antimicrobial (A-C) or in presence of 2(5H)-furanone derivative

184 (F105, D-F) specifically inhibiting the biofilm formation by *S. aureus* and exhibiting no effects

185 on *P. aeruginosa*. The 48-h old biofilms were stained by Syto9/PI and assessed by CLSM. The

186 images show a plan view on a basal biofilm layer and a cross section through the biofilm. The

187 scale bars indicate 10 μm. *S. aureus* cell clumps in a mixed biofilm are shown by arrows.

188

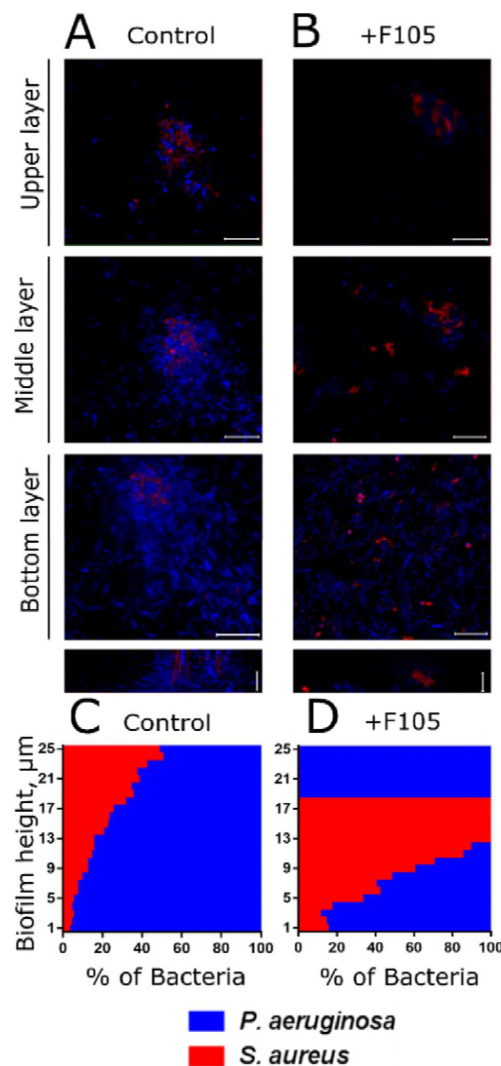

189

190

191 **Fig 3. The distribution of *S. aureus* and *P. aeruginosa* in the mixed biofilm.**

192 Cells were grown without any antimicrobial (A, C) or in presence of F105 specifically inhibiting

193 the biofilm formation by *S. aureus* cells (B, D). The 48-h old biofilms were stained by

194 ViaGram<sup>TM</sup> Red<sup>+</sup> to differentiate *S. aureus* (stained in red) and *P. aeruginosa* (stained in blue)

195 and assessed by CLSM. The CLSM images show a plan view on an upper, middle or bottom

196 biofilm layer and a cross section through the biofilm. The scale bars indicate 10 μm. (C, D) The

197 distribution of *S. aureus* and *P. aeruginosa* in the biofilm layers expressed as their relative

198 fractions.

199

200

201           In the last decades different approaches to inhibit the biofilm formation by various  
202 bacteria were developed [47, 48, 50], appearing nowadays more successful in prevention of  
203 *S. aureus* biofilm formation [53, 54, 56]. Therefore we simulated the *S. aureus* - *P. aeruginosa*  
204 mixed biofilm formation under the conditions of biofilm-preventing treatment. For that, bacteria  
205 were cultivated in the presence of a derivative of 2(5H)-furanone denoted as F105, identified  
206 recently study as an efficient inhibitor of growth and biofilm formation by *S. aureus* [65, 67],  
207 while exhibiting no significant effect against *P. aeruginosa* (Table 1).

208           When *S. aureus* was grown in the presence of 2.5 µg/ml of F105, no biofilm was formed,  
209 while most of the cells remained viable (Fig 2 D). As expected, no significant effect of F105 on  
210 cell viability of *P. aeruginosa* could be observed (Fig 2 E, Table 1). Moreover, the biofilm  
211 formation was slightly increased as determined by crystal violet staining (Fig S2) and CLSM  
212 (compare Fig 2 B and E). Therefore, we next used F105 to obtain a model of *S. aureus* -  
213 *P. aeruginosa* mixed biofilm where the biofilm formation by *S. aureus* is repressed and the  
214 matrix is produced predominantly by *P. aeruginosa*.

215

216 **Table 1. ECOFF, MIC and MBC values in  $\mu\text{g}/\text{mL}$  of various antibiotics against *S. aureus***  
217 **and *P. aeruginosa*. MIC and MBC were assessed by the broth microdilution.**

|      | <i>S. aureus</i> |      |     | <i>P. aeruginosa</i> |     |     |
|------|------------------|------|-----|----------------------|-----|-----|
|      | ECOFF            | MIC  | MBC | ECOFF                | MIC | MBC |
| F105 | ND               | 2.5  | 5   | ND                   | ND  | ND  |
| Van  | 2.0              | 4    | 32  | ND                   | ND  | ND  |
| Tet  | 1.0              | 0.25 | 128 | ND                   | 16  | ND  |
| Cef  | 8.0              | 8    | 128 | ND                   | 32  | ND  |
| Amp  | ND               | 0.5  | 16  | ND                   | ND  | ND  |
| Ami  | 8.0              | 2    | 64  | 16                   | 1   | 64  |
| Gen  | 2.0              | 4    | 32  | 8.0                  | 8   | 64  |
| Cip  | 1.0              | 1    | 64  | 0.5                  | 4   | 64  |

218 \*ND – not determined

219

220 When *S. aureus* and *P. aeruginosa* were grown together in the presence of F105,  
221 *S. aureus* clumps were also observed, similarly to the control (compare Fig 2 C and F),  
222 suggesting that *S. aureus* cells are able to form clusters inside the biofilm of *P. aeruginosa*,  
223 despite of its antagonistic pressure (see white arrows on Fig 2F). In marked contrast to the  
224 control, the cells were observed only in the bottom layers of the biofilm (compare Fig 3 C and D)  
225 suggesting that under conditions of anti-biofilm pressure *S. aureus* is apparently able to hide in  
226 the biofilm formed by *P. aeruginosa* and survive there.

227 The microscopic data were further validated by direct CFU counting in the biofilm; by  
228 using mannitol salt agar plates and cetrimide agar plates the bacterial species were differentiated  
229 and their CFUs were counted separately (Fig S3). In the presence of F105 the amount of  
230 adherent viable *S. aureus* cells decreased by 6 orders of magnitude in monoculture, suggesting

231 complete inhibition of the biofilm formation, while no significant differences in CFUs of  
232 *P. aeruginosa* could be observed (Fig S3). In a mixed biofilm, the *S. aureus* to *P. aeruginosa*  
233 ratio remained unchanged in the control, while the fraction of viable *S. aureus* cells decreased  
234 slightly in the presence of F105, this way confirming CLSM data and supporting the hypothesis  
235 that *S. aureus* is able to survive in the *P. aeruginosa* biofilm when its own biofilm formation is  
236 repressed.

237

### 238 **Atomic force microscopy**

239 The atomic force microscopy of both monocultures and mixed biofilms of *S. aureus* -  
240 *P. aeruginosa* confirmed the CLSM data. Thus, in control wells the biofilms of monocultures of  
241 both strains formed a typical confluent multilayer biofilm (Fig 4, A, B), in mixed biofilm  
242 *S. aureus* was prevalently distributed in the upper layers (Fig 4 C). Interestingly, the adhesion  
243 force of the mixed biofilm was 3-fold lower compared to *S. aureus* monoculture biofilm and 2-  
244 fold lower compared to *P. aeruginosa* monoculture biofilm (Table 2), suggesting more irregular  
245 structure of the mixed biofilm [39]. When growing with F105, only *P. aeruginosa* could be  
246 observed on the biofilm surface in the mixed culture, suggesting that *S. aureus* was hidden into  
247 the lower biofilm layers. Since the adhesion force of the mixed biofilm in the presence of F105  
248 was similar to that one in the monoculture *P. aeruginosa* (Table 2, Fig 7 F), we assumed that the  
249 biofilm matrix under these conditions was presumably formed by *P. aeruginosa*.

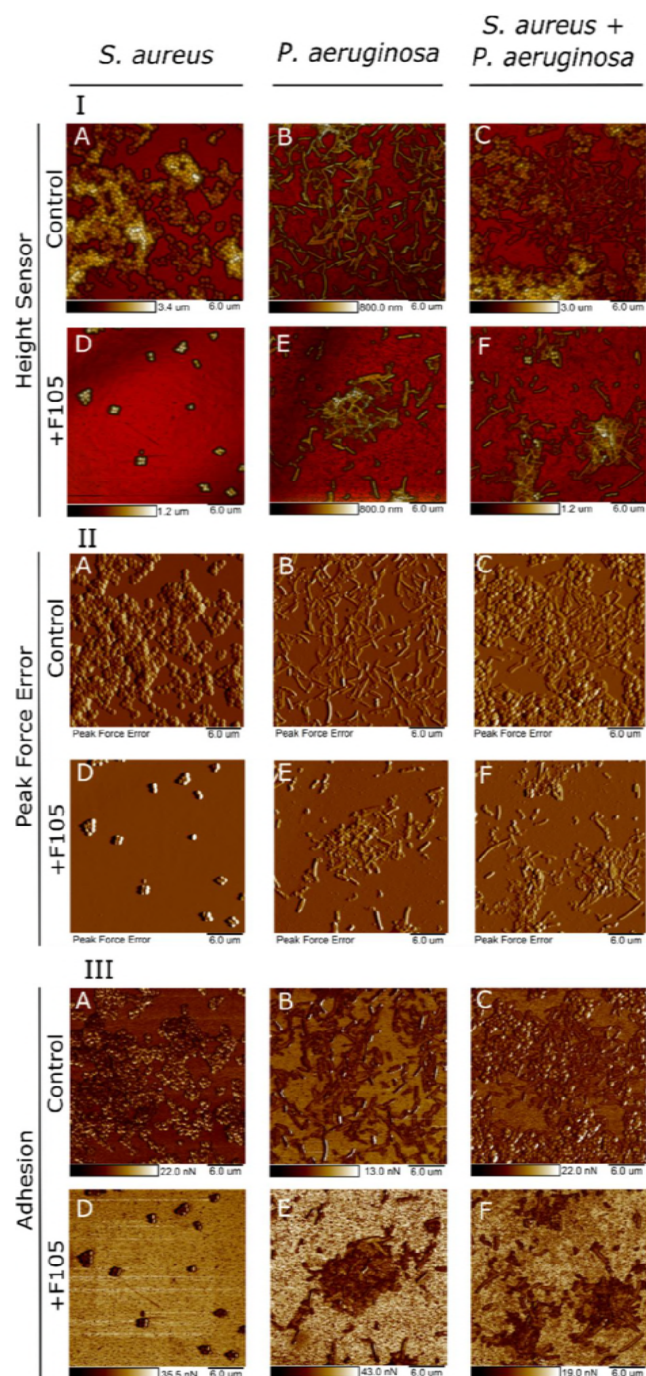

250

251

252 **Fig 4. Atomic force microscopy (Peak Force Tapping mode) of mono- and polymicrobial**

253 **biofilms formed by *S. aureus* and *P. aeruginosa*.** Cells were grown without any antimicrobials

254 (A-C) or in presence of F105 specifically inhibiting the biofilm formation by *S. aureus* cells (D-

255 F) for 48 hours, then the plates were washed, fixed with glutardialdehyde and analyzed with

256 AFM. While (I) shows sensor height (topography), (II) shows 3D reconstruction of height  
257 channel image and (III) indicates adhesion.

258

259 **Table 2. The adhesion force of *S. aureus* and *P. aeruginosa* monoculture and mixed**

260 **biofilms.** To repress the biofilm formation F105 was added up to 2.5 µg/ml.

| Biofilm former                          | F105 concentration, µg/ml | Adhesion, nN |
|-----------------------------------------|---------------------------|--------------|
| <i>S. aureus</i>                        | 0                         | 17.4 ± 4.84  |
| <i>S. aureus</i>                        | 2.5                       | 12.1 ± 3.50  |
| <i>P. aeruginosa</i>                    | 0                         | 11.3 ± 3.40  |
| <i>P. aeruginosa</i>                    | 2.5                       | 10.4 ± 5.70  |
| <i>S. aureus</i> + <i>P. aeruginosa</i> | 0                         | 6.1 ± 0.34   |
| <i>S. aureus</i> + <i>P. aeruginosa</i> | 2.5                       | 10.3 ± 0.47  |

261

262 ***S. aureus* and *P. aeruginosa* susceptibility to antibiotics in mixed**  
263 **biofilms**

264 Our data suggest that *S. aureus* under anti-biofilm treatment conditions is able to form  
265 cell clumps in the biofilm of *P. aeruginosa*, thereby apparently changing their tolerance to  
266 antimicrobials. To further verify this assumption, the effect of various conventional antibiotics  
267 on preformed mono- and polymicrobial biofilms was studied. The 48-h old monoculture and  
268 mixed biofilms were prepared in 24-well adhesive plates in either absence or presence of F105 to  
269 repress the biofilm formation by *S. aureus* itself. Then the biofilms were washed with sterile  
270 0.9% NaCl and wells were loaded with fresh broth supplemented with antibiotics at wide range  
271 of final concentrations to fill the range of their 1-16 fold MBCs (see Table 1 for MBC values).  
272 After 24h incubation the amount of CFUs of both *S. aureus* and *P. aeruginosa* in the biofilm was



273 determined by the drop plate assay and the distribution of cells in the mixed biofilm was  
274 assessed by CLSM.

275 First, the biofilm-eradicating activity was investigated for the antibiotics conventionally  
276 used for *S. aureus* treatment but typically inefficient against *P. aeruginosa* including  
277 vancomycin, tetracycline, ampicillin and ceftriaxone (Fig 5, S4). In monoculture, vancomycin  
278 reduced the amount of viable *S. aureus* cells in the biofilm by 3 orders of magnitude at 16×MBC  
279 (Fig 5 A). Expectedly, when *S. aureus* cells were grown in the presence of F105 (2.5 µg/ml) and  
280 therefore no biofilm could be formed, bacteria were found completely dead after 24-h exposition  
281 to the antibiotic at 1-2×MBC (Fig 5 C). Irrespective of either presence or absence of F105  
282 *P. aeruginosa* remained resistant to the antibiotic (Fig 5 B, D).

283 In a mixed culture, irrespective of the *S. aureus* biofilm formation repression by F105,  
284 viable *S. aureus* cells were identified within the biofilm and the efficiency of antibiotics reduced  
285 drastically (Fig 5 A, C, compare reds and violets). Statistical significance of this discrepancy was  
286 confirmed by the Kruskal-Wallis statistical test at  $p < 0.05$ .

287 For a deeper understanding of localization and viability of bacteria in mixed biofilms  
288 under vancomycin treatment also CLSM analysis was performed. In the presence of F105 no  
289 biofilm of *S. aureus* could be observed resulting in significant decrease of viable cells fraction  
290 after vancomycin treatment, in contrast to the biofilm-embedded cells (compare Fig 5 E and H).  
291 In the mixed biofilm coccal cell clusters were formed in the biofilm matrix similarly to the  
292 control (compare Fig 2 C, F and 5, G, J), suggesting that *staphylococci* are able to escape the  
293 antimicrobials and survive by embedding itself into the polymicrobial biofilm.

294 The distribution of bacteria in the mixed biofilm layers was also assessed by differential  
295 staining of *S. aureus* and *P. aeruginosa* by the ViaGram<sup>TM</sup> Red<sup>+</sup> (Fig 6). In marked contrast to  
296 the control where *S. aureus* was mostly located in the top layers of the biofilm, under  
297 vancomycin treatment most of the cells appeared in the lower and middle layers of the biofilm

298 (compare Fig 3 and Fig 6) suggesting that vancomycin-resistant *P. aeruginosa* cells in the upper  
299 layers of the biofilm apparently prevented the penetration of the antibiotic into the matrix this  
300 way reducing the susceptibility of *S. aureus* to antibiotics considerably. Of note, *S. aureus* cells  
301 remained presumably viable in bottom layers apparently because of protection by *P. aeruginosa*  
302 cells (Fig S5).  
303

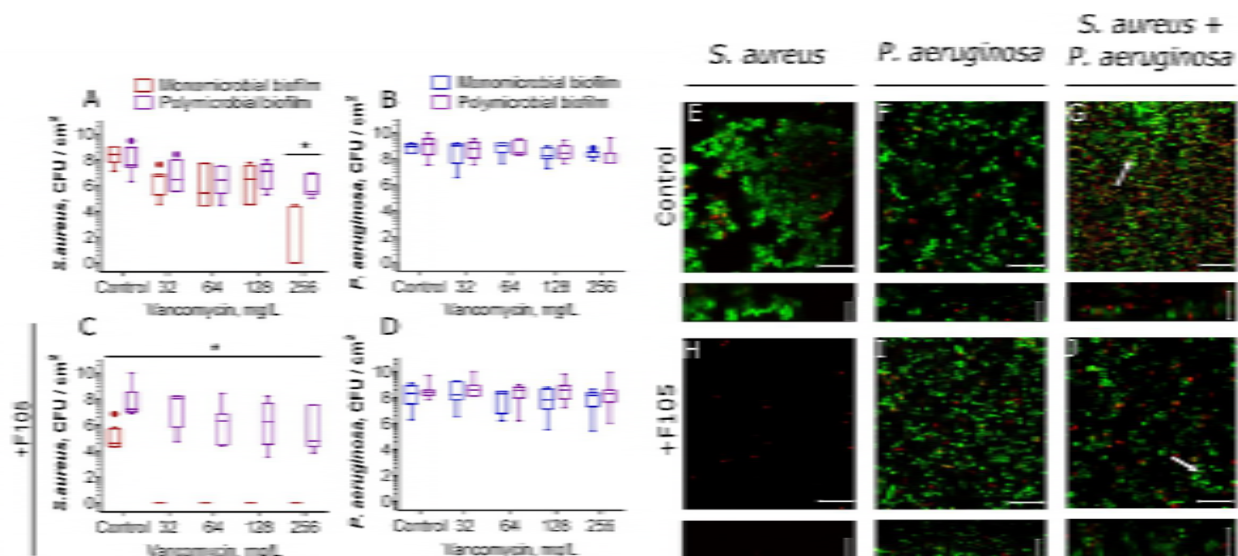

304

305 **Fig 5. The effect of vancomycin on viability of *S. aureus* and *P. aeruginosa* embedded into**  
306 **their mono- and polymicrobial biofilms.**

307 Antimicrobial was added to 48 hours-old biofilms grown in absence (A-B) or presence (C-D) of  
308 F105 to inhibit the biofilm formation by *S. aureus*. After 24 h incubation, the biofilms were  
309 analyzed by CFUs counting or Syto9/PI staining followed by CLSM. The images show a plan  
310 view on a basal biofilm layer and a cross section through the biofilm. The scale bars indicate  
311 μm. Asterisk shows significant difference between CFUs number between monoculture and  
312 mixed biofilms.

313

314

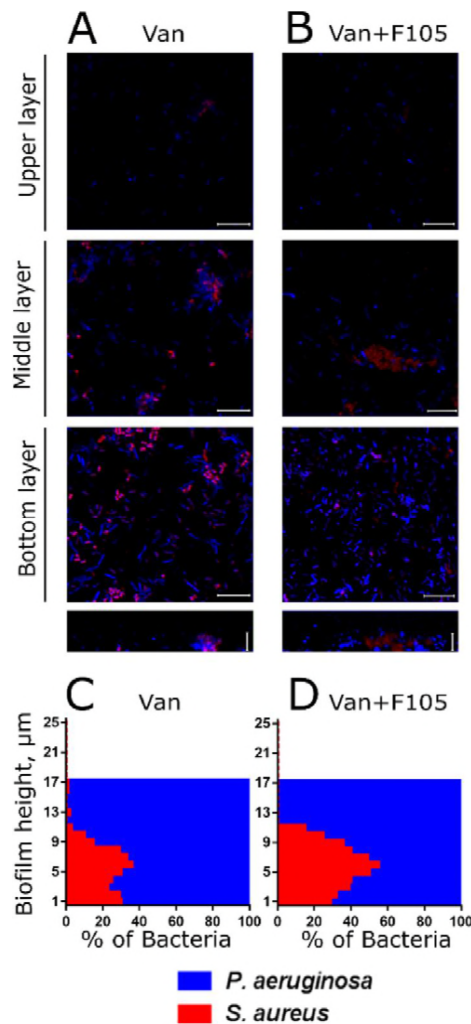

315

316

317 **Fig. 6. The effect of vancomycin on *S. aureus* and *P. aeruginosa* distribution in mixed**  
318 **biofilms grown either in absence (A, C) or in presence of F105 specifically inhibiting the**  
319 **biofilm formation by *S. aureus* cells (B, D).**

320 Vancomycin (256  $\mu\text{g}/\text{mL}$  corresponding to  $8\times\text{MBC}$  for *S. aureus*) was added to 48 hours-old  
321 biofilms. After 24 h incubation, the biofilms were stained by ViaGram<sup>TM</sup> Red<sup>+</sup> to differentiate  
322 *S. aureus* (stained in red) and *P. aeruginosa* (stained in blue) and assessed by CLSM. The  
323 images show a plan view on an upper, middle or bottom biofilm layer and a cross section  
324 through the biofilm. The scale bars indicate 10  $\mu\text{m}$ . (C, D) The distribution of *S. aureus* and  
325 *P. aeruginosa* in the biofilm layers are given by their relative fractions.

326

327 Similarly to vancomycin, treatment by ampicillin, tetracycline and ceftriaxone was  
328 almost inefficient against biofilm-embedded *S. aureus*, while under conditions of biofilm  
329 formation repression by F105, the 1-2×MBC of antimicrobials led to the complete death of cells  
330 in 24 h (Fig S4). Again, in the mixed culture, despite of the *S. aureus* biofilm formation  
331 repression, viable *S. aureus* cells could be identified within the biofilm. CLSM analysis indicated  
332 considerable redistribution of *S. aureus* from upper to the bottom layers of the biofilm (Fig S6,  
333 cells distribution patterns) leading to reduced antibiotic efficacy. Under double treatment by  
334 F105 and antimicrobials, the prevalence of *P. aeruginosa* in the biofilm was observed in  
335 agreement with the CFU count data (Fig S4 and S6). These data suggest that under anti-biofilm  
336 or antimicrobial treatment conditions *S. aureus* changes its preferred topical localizations by  
337 hiding in the lower layers of mixed biofilm formed by another bacterium like *P. aeruginosa*  
338 insensitive to most antimicrobials thereby increasing its resistance to the treatment.

339 Next, we investigated the effect of broad-spectrum antimicrobials such as ciprofloxacin,  
340 amikacin and gentamycin which are active against both *S. aureus* and *P. aeruginosa* (see Table  
341 1). In contrast to the previous group of antimicrobials, in monoculture high concentrations of  
342 ciprofloxacin efficiently eradicated even the biofilm-embedded *P. aeruginosa* (Fig 7 B).  
343 Interestingly, when the mixed biofilm was treated, nearly 10-fold lower concentration of  
344 antimicrobial was required to obtain similar reduction of *P. aeruginosa* CFUs in the biofilm.  
345 Moreover, in the mixed biofilm complete death of both *P. aeruginosa* and *S. aureus* could be  
346 observed at 8×MBC of ciprofloxacin, in marked contrast to monocultures. Similarly, 1-2×MBC  
347 of aminoglycosides (amikacin or gentamicin) led to the complete death of both *P. aeruginosa*  
348 and *S. aureus* in mixed biofilm (Fig 8) while reducing their CFUs in monocultures only by 2-3  
349 orders of magnitude at 8×MBCs.

350

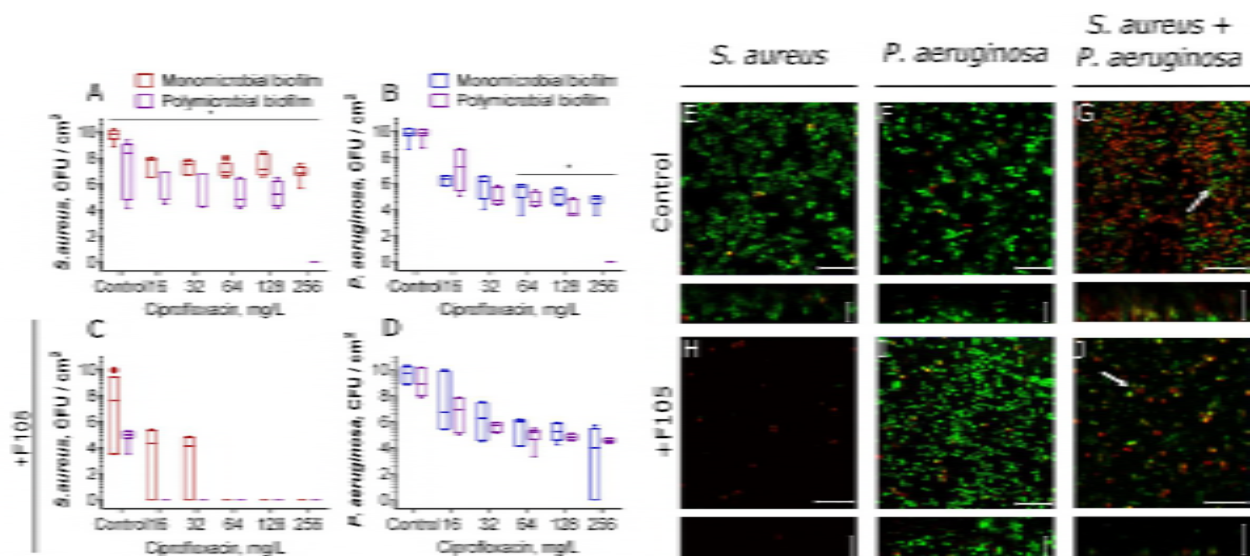

351

352 **Fig 7. The effect of ciprofloxacin on viability of *S. aureus* and *P. aeruginosa* embedded into**  
353 **their mono- and polymicrobial biofilms.** Antimicrobial was added to 48 hours-old biofilms  
354 grown in absence (A-B) or presence (C-D) of F105 to inhibit the biofilm formation by *S. aureus*.  
355 After 24 h incubation, the biofilms were analyzed by CFUs counting or Syto9/PI staining  
356 followed by CLSM. The images show a plan view on a basal biofilm layer and a cross section  
357 through the biofilm. The scale bars indicate 10  $\mu$ m. Asterisks show significant difference  
358 between CFUs number between monoculture and mixed biofilms.

359

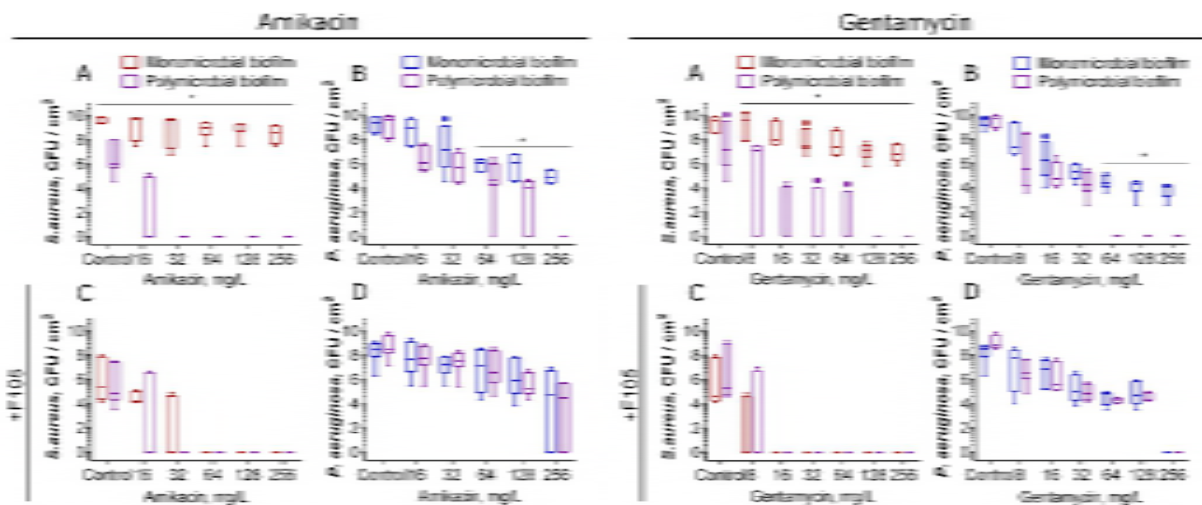

360

361 **Fig 8. The effect of amikacin and gentamicin on viability of *S. aureus* and *P. aeruginosa* in**  
362 **mono- and polymicrobial biofilms.**

363 Antimicrobials were added to 48 hours-old biofilms grown in absence (A-B) or presence (C-D)  
364 of F105 to inhibit the biofilm formation by *S. aureus*. After 24 h incubation, the biofilms were  
365 analyzed by CFUs counting. Asterisks show significant difference between CFUs number  
366 between monoculture and mixed biofilms.

367

368 In the presence of F105, just 1×MBC of any tested antimicrobial was already sufficient  
369 for the complete eradication of *S. aureus* biofilm (see Fig 7 C and Fig 8 C), similarly to the  
370 previous group of antibiotics such as vancomycin, tetracycline, ampicillin and ceftriaxone (see  
371 Fig 5 and Fig S4). The presence of F105 did not affect the susceptibility of monoculture  
372 *P. aeruginosa* biofilm to antibiotics. In contrast, in mixed biofilms inhibition of *S. aureus* by  
373 F105 restored the susceptibility of *P. aeruginosa* back to the monoculture level, suppressing the  
374 observed high efficiency of antimicrobials against this bacterium in the mixed biofilm (compare  
375 Fig 7 B and D, Fig 8 B and D). In contrast to *S. aureus*-specific antibiotics, the efficiency of  
376 ciprofloxacin and aminoglycosides against *S. aureus* in mixed biofilm in the presence of F105  
377 was similar to the monoculture level.

378           The CLSM analysis of *S. aureus* and *P. aeruginosa* monoculture and mixed biofilms  
379 treated with Ciprofloxacin confirmed the CFUs counting data. In particular, while 8×MBC did  
380 not affect either *S. aureus* or *P. aeruginosa* cells in monoculture biofilms (Fig 7E, F), in the  
381 mixed biofilm *P. aeruginosa* was identified as non-viable, although *S. aureus* remained partially  
382 alive (Fig 7 G). In marked contrast, repression of the *S. aureus* biofilm production by F105 led to  
383 a reversal with most *P. aeruginosa* cells green-stained while *S. aureus* identified as non-viable in  
384 mixed culture (Fig 7 J).

385           The distribution of bacteria in the mixed biofilm layers under treatment with  
386 ciprofloxacin was also assessed by differential staining of *S. aureus* and *P. aeruginosa* using  
387 ViaGram™ Red<sup>+</sup> (Fig 9). In contrast to vancomycin treatment, here *S. aureus* dominated in the  
388 upper layers of the mixed biofilm (compare Fig 6 and 9 A and C) and remain alive, while  
389 *P. aeruginosa* were presumably dead (See Fig S5, S7, S8) suggesting no reversal protection of  
390 *P. aeruginosa* by *S. aureus* biofilm. On the other hand, double treatment by ciprofloxacin  
391 combined with F105 resulted in hiding of *S. aureus* in the bottom layers of the biofilm and  
392 increased resistance of *P. aeruginosa*. Treatment by amikacin and gentamycin led to  
393 considerably different distributions of bacteria over the biofilm layers with the prevalence of  
394 *S. aureus* in the bottom layers irrespective of its biofilm repression by F105 (Fig S8, cells  
395 distribution patterns) but qualitatively similar bacterial survival patterns (see Fig S6). Moreover,  
396 under single antibiotic treatment *P. aeruginosa* were presumably dead, while *S. aureus* remained  
397 viable (Fig S8). In the presence of F105 *P. aeruginosa* remained alive and much less *S. aureus*  
398 cells could be observed in the biofilm, as almost all of them were identified as non-viable.

399           Taken together these data suggest complex interspecies interactions between *S. aureus*  
400 and *P. aeruginosa* in mixed biofilm under treatment by antimicrobials with different specificity.

401

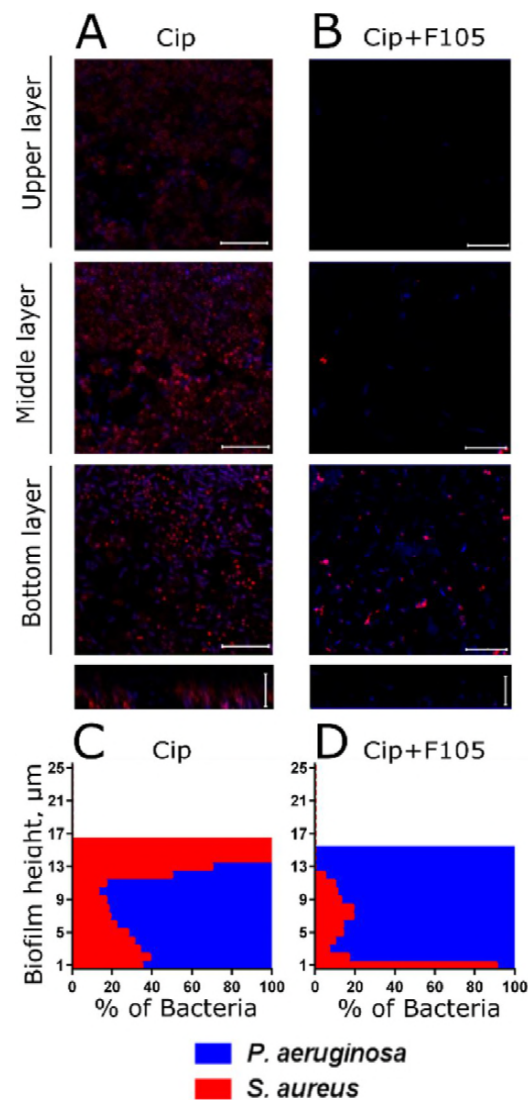

402

403 **Fig 9. The effect of ciprofloxacin on *S. aureus* and *P. aeruginosa* distribution in mixed**  
404 **biofilms grown normally (A, C) or in presence of F105 specifically inhibiting the biofilm**  
405 **formation by *S. aureus* cells (B, D).**

406 Ciprofloxacin (512 μg/mL corresponding to 8×MBC for *S. aureus*) was added to 48 hours-old  
407 biofilms. After 24 h incubation, the biofilms were stained by ViaGram™ Red<sup>+</sup> to differentiate  
408 between *S. aureus* (red-stained) and *P. aeruginosa* (blue-stained) and assessed by CLSM. The  
409 images show a plan view on an upper, middle or bottom biofilm layer (indicated by arrows) and  
410 a cross section through the biofilm. The scale bars indicate 10 μm. (C, D). *S. aureus* and  
411 *P. aeruginosa* distributions over the biofilm layers are expressed by their relative fractions.

412



413

414 **Intervention of *P. aeruginosa* into *S. aureus* biofilm and vice versa as a**  
415 **possible way to enhance antimicrobial susceptibility**

416 Our results indicate that under appropriate conditions both *S. aureus* and *P. aeruginosa*  
417 due to their antagonistic interactions appear more susceptible to broad-spectrum antimicrobials  
418 in polymicrobial biofilms, compared to their monoculture counterparts. Based on these data, we  
419 have suggested that also the susceptibility of monoculture biofilms could be increased by  
420 deliberate intervention of *P. aeruginosa* into preformed *S. aureus* biofilm, and vice versa.

421 To verify the efficacy of this approach, *P. aeruginosa* suspension ( $10^6$  CFU/mL) was  
422 added to the 24 h-old *S. aureus* biofilm and bacteria were incubated for the next 24 h. Then the  
423 biofilm was washed by sterile saline and fresh broth containing different antimicrobials was  
424 added into the wells. After 24 h the number of *P. aeruginosa* and *S. aureus* CFUs was counted  
425 by using differential media.

426 The introduction of *P. aeruginosa* into *S. aureus* biofilm did not change the efficacy of  
427 any antibiotic against *P. aeruginosa* itself (Fig 10, lane II). In contrast,  $1\times$ MBC of ciprofloxacin  
428 led to the reduction of viable *S. aureus* in biofilm by 3 orders of magnitude, while in the  
429 monoculture  $4-8\times$ MBC was required to achieve the same effect (Fig 10, lane I, compare reds and  
430 violets). Amikacin and gentamycin, being almost inefficient against *S. aureus* monoculture  
431 biofilm up to  $8\times$ MBC, were able to decrease the *S. aureus* CFUs in biofilm by 3 orders of  
432 magnitude already at  $1-2\times$ MBC after introduction of *P. aeruginosa* with the most pronounced  
433 effect observed for gentamycin.

434 In the reverse experiment, when *S. aureus* was added to the *P. aeruginosa* biofilm, a  
435 remarkable increase of ciprofloxacin efficacy against *P. aeruginosa* could be observed (Fig 10,  
436 lane IV, compare blues and violets), while the susceptibility of *S. aureus* itself did not change

437 significantly. The efficacy of aminoglycosides has increased only against *S. aureus*, while not  
438 against *P. aeruginosa*.

439

440

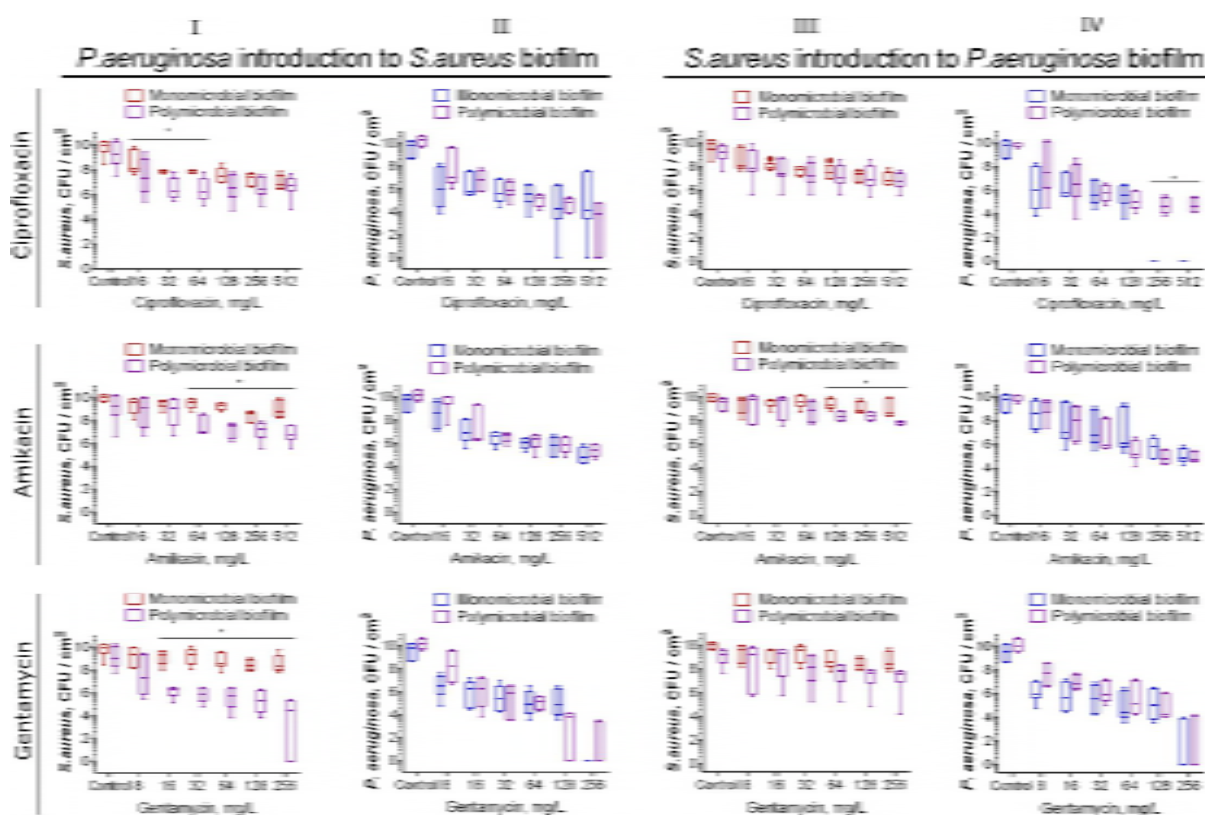

441

442 **Fig 10. The susceptibility of *P. aeruginosa* and *S. aureus* after introduction of the antagonist**  
443 **into monoculture biofilms.**

444 (I-II) *P. aeruginosa* suspension in a fresh broth was added to the preformed 24-h old biofilm of  
445 *S. aureus* or (III-IV) *S. aureus* was added to the preformed 24-h old biofilm of *P. aeruginosa* and  
446 cultivation was continued for the next 24 h. Then antimicrobials were added and after 24 h  
447 incubation the biofilms were analyzed by CFUs counting. Asterisks show significant difference  
448 between CFUs number between monoculture and mixed biofilms.

449

450

## 451           **Discussion**

452           Biofilm formation represents an important virulence factor of many bacteria, as the  
453 extracellular matrix drastically reduces their susceptibility to antimicrobials resulting in up to  
454 1000-fold higher tolerance to antibiotics of biofilm-embedded cells compared to their planktonic  
455 forms [14, 68, 69]. In contrast, polymicrobial communities are often characterized by concurrent  
456 interspecies interactions that likely overwhelm the potential benefits from biofilm protection.  
457 Here we have shown that the antagonistic interactions between *S. aureus* and *P. aeruginosa*, the  
458 most common pathogenic agents causing various nosocomial infections [7-9], drastically affect  
459 their susceptibility to antibiotics making them significantly more or less vulnerable to treatment  
460 than in monoculture biofilms depending on both conditions and chosen antimicrobial agents.

461           Despite of the antagonistic relationship between *S. aureus* and *P. aeruginosa* described in  
462 multiple studies [22, 23], these bacteria can be found in close association in acute and chronic  
463 wounds being embedded into mixed biofilms [8, 24-28]. Our *in vitro* data show that the  
464 inoculation of *S. aureus* to the mature *P. aeruginosa* biofilm or *vice versa* leads to the formation  
465 of mixed biofilm, although with the prevalence of the first biofilm former (Fig 1). The co-  
466 cultivation of both bacteria results in the formation of a more rigid biofilm, where *S. aureus* is  
467 located mainly in the upper layers, while *P. aeruginosa* can be found mostly in the lower layers  
468 of the biofilm (Fig 3), in agreement with earlier data [15, 28-31].

469           Next, we investigated the effect of two groups of antimicrobials on bacterial viability in  
470 mixed biofilms. The first group contained vancomycin, tetracycline, ampicillin and ceftriaxone  
471 that are known to exhibit specific activity against *S. aureus* while leaving *P. aeruginosa* nearly  
472 unaffected. The second group included broad-spectrum antibiotics such as Ciprofloxacin,  
473 Gentamicin and Amikacin that exhibited comparable MBC values against both studied bacteria  
474 (see Table 1). Additionally, we also simulated the biofilm-preventing treatment with earlier  
475 described compound F105, specifically affecting only *S. aureus* biofilm formation[65]. In

476 control experiments with *S. aureus* monoculture biofilms, none of the antimicrobials exhibited  
477 any bactericidal effect at their 8-16×MBCs, while 1×MBC was already sufficient for the  
478 complete eradication of all adherent cells under biofilm repression conditions with F105  
479 (compare Figs 5, 7, 8, S4, reds on panels A and C). In addition, ciprofloxacin, gentamicin and  
480 amikacin at 8×MBCs significantly reduced the number of CFUs of biofilm-embedded  
481 *P. aeruginosa* (Figs 5, 7, 8, S4, blues on panels B and D).

482 In mixed biofilms, treatment with antimicrobials active specifically against *S. aureus*  
483 such as vancomycin, tetracycline, ampicillin and ceftriaxone as well as by biofilm repressing  
484 agent F105, *S. aureus* could successfully escape from the treatment by re-localization to the  
485 middle and lower layers of the biofilm. Irrespective of the *S. aureus* biofilm formation  
486 repression, *S. aureus* cells remained viable under these conditions being embedded into the  
487 matrix of *P. aeruginosa* biofilm and were insensitive to antimicrobials (see Figs 6, S6)  
488 suggesting that *staphylococci* are able to escape the antimicrobials by embedding into the biofilm  
489 matrix of *P. aeruginosa* and survive there, despite of their antagonistic interactions. Notably, in  
490 mixed biofilms *S. aureus* formed cell clumps in the biofilm matrix (compare Fig 2 C, F and 5, C,  
491 F) presumably in the form of small colonies.

492 Remarkably, when the *S. aureus* – *P. aeruginosa* mixed biofilms were treated with any of  
493 the broad-spectrum antimicrobials such as ciprofloxacin, gentamicin or amikacin, nearly 10–fold  
494 lower concentrations were sufficient to achieve the same reduction in the CFUs number of both  
495 bacteria, in comparison with monoculture treatment (Figs 7 and 8, compare violets with reds or  
496 blues on panels A and B). This effect was more pronounced for aminoglycosides, which at  
497 already 1–2×MBC led to the complete eradication of the mixed biofilm, while in monocultures  
498 8×MBC was required to reduce the number of CFUs by 3–5 orders of magnitude (Fig 8).  
499 Moreover, tetracycline and ceftriaxone, while being inefficient against *P. aeruginosa*, at high  
500 concentrations significantly reduced the CFUs of this bacterium in the mixed biofilms (Fig S4).

501           Interestingly, under repression of the *S. aureus* biofilm formation by F105, the efficiency  
502 of antimicrobials against *S. aureus* did not change significantly, while the sensitivity of  
503 *P. aeruginosa* was restored to the level characteristic for its monoculture biofilm (Figs 7 and 8,  
504 compare violets with reds or blues on panels C and D). This effect could be attributed to the  
505 redistribution of the *S. aureus* cells to the bottom levels of the mixed biofilm and significant  
506 reduction of their fraction (see Figs 9, cells distributions). On the other hand, the observed  
507 reinstatement of the *P. aeruginosa* sensitivity to antimicrobials could originate from the  
508 repression of the antagonistic factors production by *S. aureus* due to complex changes in its cell  
509 metabolism in the presence of F105. Nevertheless, the molecular basis of these complex  
510 interbacterial interactions that under certain conditions lead to a clear reversal in the  
511 antimicrobials susceptibility requires further investigations.

512           Taken together, our data clearly indicate that efficient treatment of biofilm-associated  
513 mixed infections requires antimicrobials which would be active against dominant pathogens. As  
514 we have shown for the *S. aureus* and *P. aeruginosa* mixed culture model, in this case the  
515 interbacterial antagonism under certain conditions assists antimicrobial treatment. In contrast,  
516 treatment by antibiotics with different efficacy against various consortia members leads to the  
517 survival of sensitive cells in the matrix formed by the resistant ones.

518           Finally, we have shown that *S. aureus* and *P. aeruginosa* are able to penetrate into each  
519 other's mature biofilms (see Fig 1 A and B) and by this intervention significantly affect the  
520 susceptibility of the mixed biofilm to antimicrobials (Fig 10). When *P. aeruginosa* was  
521 introduced into *S. aureus* biofilm, all antimicrobials reduced the amount of CFUs of both  
522 bacteria in the biofilm by 3 orders of magnitude at 1–2×MBC with more pronounced effect  
523 observed for gentamicin. In the reverse experiment, the inoculation of *S. aureus* to the mature  
524 *P. aeruginosa* biofilm significantly increased the efficacy of ciprofloxacin against *P. aeruginosa*.

525           From a broader perspective, we believe that artificial intervention of antagonistic  
526 bacteria into already preformed monoculture biofilms could be used to enhance their

527 antimicrobial treatment efficacy. We suggest that this approach has a strong potential of further  
528 development towards innovative treatment of biofilm-associated infections such as introduction  
529 of the skin residential microflora to the wounds and ulcers infected with nosocomial pathogens  
530 to speed up their microbial decontamination. While in this work we demonstrated the synergy of  
531 interbacterial antagonism with antimicrobials using the well-studied *S. aureus* - *P. aeruginosa*  
532 model system, we believe that many other bacteria of normal body microflora are available to  
533 antagonize with nosocomial pathogens and thus can be used for the enhancement of microbial  
534 infections treatment by using microbial transplantation.  
535

## 536 **Materials and methods**

537 Derivate of 2(5H)-furanone designed as F105 (3-Chloro-5(S)-[(1R,2S,5R)-2-isopropyl-  
538 5-methylcyclohexyloxy]-4-[4-methylphenylsulfonyl]-2(5H)-furanone) was described previously  
539 [67] and synthesized at the department of Organic Chemistry, A.M. Butlerov Chemical Institute,  
540 Kazan Federal University.

541

## 542 **Bacterial strains and growth conditions**

543 *Staphylococcus aureus subsp. aureus* (ATCC® 29213™) and *Pseudomonas aeruginosa*  
544 (ATCC® 27853™) were used in this assay. The bacterial strains were stored in 10 % (V/V)  
545 glycerol stocks at -80 °C and freshly streaked on blood agar plates (BD Diagnostics) followed  
546 by their overnight growth at 35°C before use. Fresh colony material was used to adjust an optical  
547 density to 0.5 McFarland (equivalent to 10<sup>8</sup> cells/mL) in 0.9 % NaCl solution that was used as a  
548 working suspension. For the biofilm assay the previously developed BM broth (glucose 5g,  
549 peptone 7g, MgSO<sub>4</sub>× 7H<sub>2</sub>O 2.0g and CaCl<sub>2</sub>× 2H<sub>2</sub>O 0.05g in 1.0 liter tap water) [49, 63, 70]  
550 where both *S. aureus* and *P. aeruginosa* formed rigid biofilms in 2 days was used. The mannitol  
551 salt agar (peptones 10g, meat extract 1g, NaCl 75g, D-mannitol 10g, agar-agar 12g in 1.0 liter  
552 tap water, Oxoid) and cetrимide agar (Sigma) were used to distinguish *S. aureus* and  
553 *P. aeruginosa*, respectively, in mixed cultures. Bacteria were grown under static conditions at  
554 35°C for 24–72 hours as indicated.

555

## 556 **Biofilm assays**

557 Biofilm formation was assessed in 24-well polystyrol plates (Eppendorf) by staining  
558 with crystal violet as described earlier in [71] with modifications. Bacteria with an initial density  
559 of 3×10<sup>7</sup> CFU/ml were seeded in 2 ml BM at 37°C and cultivated for 48 h under static  
560 conditions. Then the culture liquid was removed and the plates were washed once with

561 phosphate-buffered saline (PBS) pH=7.4 and dried for 20 min. Then, 1 ml of a 0.5% crystal  
562 violet solution (Sigma-Aldrich) in 96% ethanol was added per well followed by incubation for  
563 20 min. The unbounded dye was washed off with PBS. The bound dye was eluted in 1 ml of  
564 96% ethanol, and the absorbance at 570 nm was measured on a Tecan Infinite 200 Pro  
565 microplate reader (Switzerland). Cell-free wells subjected to all staining manipulations were  
566 used as control.

567 The biofilms were additionally analyzed by confocal laser scanning microscopy  
568 (CLSM) on Carl Zeiss LSM 780 confocal microscope. Both mono- and mixed cultures of  
569 *S. aureus* and *P. aeruginosa* were grown on cell imaging cover slips (Eppendorf) under static  
570 conditions for 48 h in BM broth. Next one-half of the medium was replaced by the fresh one  
571 containing antimicrobials at final concentrations as indicated and cultivation was continued for  
572 the next 24 h. The samples were then stained for 5 min with the SYTO® 9 (ThermoFisher  
573 Scientific) at final concentration of 0.02 µg/ml (green fluorescence) and propidium iodide  
574 (Sigma) at final concentration of 3 µg/ml (red fluorescence) to differentiate between viable and  
575 non-viable bacteria. To differentiate between gram-positive and gram-negative bacterial species  
576 ViaGram™ Red<sup>+</sup> (ThermoFisher Scientific) was used. The microscopic images were obtained  
577 with a 1-µm Z-stacks.

578

### 579 **Evaluation of antibacterial activity**

580 The minimum inhibitory concentration (MIC) of antimicrobials was determined by the  
581 broth microdilution method in 96-well microtiter plates (Eppendorf) according to the  
582 recommendation of the European Committee for Antimicrobial Susceptibility Testing  
583 (EUCAST) rules for antimicrobial susceptibility testing [72]. Briefly, the 10<sup>8</sup> cells/mL bacterial  
584 suspension was subsequently diluted 1:300 with BM broth supplemented with various  
585 concentrations of antimicrobials in microwell plates to obtain a 3×10<sup>5</sup> cells/mL suspension. The



586 concentrations of antimicrobials ranged from 0.25 to 512 mg/L. Besides the usual double  
587 dilutions, additional concentrations were included in between. The cultures were next incubated  
588 at 35°C for 24 h. The MIC was determined as the lowest concentration of antimicrobials for  
589 which no visible bacterial growth could be observed after 24 h incubation.

590 To determine the MBC of antimicrobials the CFU/mL were further evaluated in the  
591 culture liquid from those wells without visible growth. 10 µl of the culture liquid from the wells  
592 with no visible growth were inoculated into 3ml of LB broth followed by cultivation for 24h.  
593 The MBC was determined as the lowest concentration of compound for which no visible  
594 bacterial growth could be observed according to the EUCAST of the European Society of  
595 Clinical Microbiology and Infectious Diseases (ESCMID) [73].

596

### 597 **Drop plate assay**

598 To evaluate the viability of both detached and planktonic cells, a series of 10-fold  
599 dilutions of liquid culture from each well were prepared in 3 technical repeats and dropped by 5  
600 µl onto LB agar plates. CFUs were counted from the two last drops typically containing 5-15  
601 colonies and further averaged. To evaluate the viability of the biofilm-embedded cells, the wells  
602 were washed twice with 0.9% NaCl in order to remove the non-adherent cells. The biofilms were  
603 also suspended in 0.9% NaCl by scratching the well bottoms with subsequent treatment in an  
604 ultrasonic bath for 2 min to facilitate the disintegration of bacterial clumps [63]. Viable cells  
605 were counted by the drop plate method as described above.

606

### 607 **Statistical analysis**

608 Experiments were carried out in six biological repeats with newly prepared cultures and  
609 medium in each of them. The fraction of non-viable cells in microscopic images was estimated  
610 as the relative fraction of the red cells among all cells in the combined images obtained by

611 overlaying of the green and the red fluorescence microphotographs (10 images per each sample)  
612 by using BioFilmAnalyzer software[74]. The statistical significance of the discrepancy between  
613 monoculture and mixed biofilms treatment efficacy was determined using the Kruskal-Wallis  
614 statistical test with significance threshold at  $p < 0.05$ .  
615

## References

- 617 1. Kirker KR, James GA. In vitro studies evaluating the effects of biofilms on wound-  
618 healing cells: a review. *Apmis*. 2017;125(4):344-52. doi: 10.1111/apm.12678. PubMed PMID:  
619 WOS:000399449800008.
- 620 2. Kirker KR, Secor PR, James GA, Fleckman P, Olerud JE, Stewart PS. Loss of viability  
621 and induction of apoptosis in human keratinocytes exposed to *Staphylococcus aureus* biofilms in  
622 vitro. *Wound Repair and Regeneration*. 2009;17(5):690-9. doi: 10.1111/j.1524-  
623 475X.2009.00523.x. PubMed PMID: WOS:000269732700009.
- 624 3. Marano RJ, Wallace HJ, Wijeratne D, Fear MW, Wong HS, O'Handley R. Secreted  
625 biofilm factors adversely affect cellular wound healing responses in vitro. *Scientific Reports*.  
626 2015;5. doi: 10.1038/srep13296. PubMed PMID: WOS:000359538200001.
- 627 4. Secor PR, James GA, Fleckman P, Olerud JE, McInnerney K, Stewart PS.  
628 *Staphylococcus aureus* Biofilm and Planktonic cultures differentially impact gene expression,  
629 mapk phosphorylation, and cytokine production in human keratinocytes. *Bmc Microbiology*.  
630 2011;11. doi: 10.1186/1471-2180-11-143. PubMed PMID: WOS:000293290100001.
- 631 5. den Reijer PM, Haisma EM, Lemmens-den Toom NA, Willemsse J, Koning RI, Demmers  
632 JAA, et al. Detection of Alpha-Toxin and Other Virulence Factors in Biofilms of *Staphylococcus*  
633 *aureus* on Polystyrene and a Human Epidermal Model (vol 11, e0145722, 2016). *Plos One*.  
634 2016;11(3). doi: 10.1371/journal.pone.0152544. PubMed PMID: WOS:000372708000151.
- 635 6. Kirker KR, James GA, Fleckman P, Olerud JE, Stewart PS. Differential effects of  
636 planktonic and biofilm MRSA on human fibroblasts. *Wound Repair and Regeneration*.  
637 2012;20(2):253-61. doi: 10.1111/j.1524-475X.2012.00769.x. PubMed PMID:  
638 WOS:000300943100157.
- 639 7. Harrison F. Microbial ecology of the cystic fibrosis lung. *Microbiology-Sgm*.  
640 2007;153:917-23. doi: 10.1099/mic.0.2006/004077-0. PubMed PMID: WOS:000245959200001.
- 641 8. Fazli M, Bjarnsholt T, Kirketerp-Moller K, Jorgensen B, Andersen AS, Kroghfelt KA, et  
642 al. Nonrandom Distribution of *Pseudomonas aeruginosa* and *Staphylococcus aureus* in Chronic  
643 Wounds. *Journal of Clinical Microbiology*. 2009;47(12):4084-9. doi: 10.1128/jcm.01395-09.  
644 PubMed PMID: WOS:000272230500040.
- 645 9. Tipton CD, Mathew ME, Wolcott RA, Wolcott RD, Kingston T, Phillips CD. Temporal  
646 dynamics of relative abundances and bacterial succession in chronic wound communities  
647 *Wound Repair Regulation*; 2017.
- 648 10. Foundation CF, editor. *Cystic Fibrosis Foundation Patient Registry 2012*.
- 649 11. Lewis K. Riddle of biofilm resistance. *Antimicrobial Agents and Chemotherapy*.  
650 2001;45(4):999-1007. doi: 10.1128/aac.45.4.999-1007.2001. PubMed PMID:  
651 WOS:000167647000001.
- 652 12. Atshan SS, Shamsudin MN, Sekawi Z, Lung LTT, Barantalab F, Liew YK, et al.  
653 Comparative proteomic analysis of extracellular proteins expressed by various clonal types of  
654 *Staphylococcus aureus* and during planktonic growth and biofilm development. *Frontiers in*  
655 *Microbiology*. 2015;6. doi: 10.3389/fmicb.2015.00524. PubMed PMID:  
656 WOS:000356335200001.
- 657 13. Cosgrove SE, Kaye KS, Eliopoulos GM, Carmeli Y. Health and economic outcomes of  
658 the emergence of third-generation cephalosporin resistance in *Enterobacter* species. *Archives of*  
659 *Internal Medicine*. 2002;162(2):185-90. doi: 10.1001/archinte.162.2.185. PubMed PMID:  
660 WOS:000173453100008.
- 661 14. Sanchez-Vizueté P, Orgaz B, Aymerich S, Le Coq D, Briandet R. Pathogens protection  
662 against the action of disinfectants in multispecies biofilms. *Front Microbiol*. 2015;6. doi: ARTN  
663 70510.3389/fmicb.2015.00705. PubMed PMID: WOS:000358573700003.

- 664 15. Dalton T, Dowd SE, Wolcott RD, Sun Y, Watters C, Griswold JA, et al. An In Vivo  
665 Polymicrobial Biofilm Wound Infection Model to Study Interspecies Interactions. *Plos One*.  
666 2011;6(11). doi: 10.1371/journal.pone.0027317. PubMed PMID: WOS:000297198200065.
- 667 16. Seth AK, Geringer MR, Galiano RD, Leung KP, Mustoe TA, Hong SJ. Quantitative  
668 Comparison and Analysis of Species-Specific Wound Biofilm Virulence Using an In Vivo,  
669 Rabbit-Ear Model. *Journal of the American College of Surgeons*. 2012;215(3):388-99. doi:  
670 10.1016/j.jamcollsurg.2012.05.028. PubMed PMID: WOS:000308907000011.
- 671 17. Pastar I, Nusbaum AG, Gil J, Patel SB, Chen J, Valdes J, et al. Interactions of Methicillin  
672 Resistant *Staphylococcus aureus* USA300 and *Pseudomonas aeruginosa* in Polymicrobial Wound  
673 Infection. *Plos One*. 2013;8(2). doi: 10.1371/journal.pone.0056846. PubMed PMID:  
674 WOS:000316658800043.
- 675 18. Lightbown JW & Jackson FL. Inhibition of cytochrome systems of heart muscle and  
676 certain bacteria by the antagonists of dihydrostreptomycin: 2-alkyl-4-hydroxyquinoline N-  
677 oxides 1956; 63:[130-7 pp.].
- 678 19. Palmer KL, Mashburn LM, Singh PK, Whiteley M. Cystic fibrosis sputum supports  
679 growth and cues key aspects of *Pseudomonas aeruginosa* physiology. *Journal of Bacteriology*.  
680 2005;187(15):5267-77. doi: 10.1128/jb.187.15.5267-5277.2005. PubMed PMID:  
681 WOS:000230716800025.
- 682 20. Baldan R, Cigana C, Testa F, Bianconi I, De Simone M, Pellin D, et al. Adaptation of  
683 *Pseudomonas aeruginosa* in Cystic Fibrosis Airways Influences Virulence of *Staphylococcus*  
684 *aureus* In Vitro and Murine Models of Co-Infection. *Plos One*. 2014;9(3). doi:  
685 10.1371/journal.pone.0089614. PubMed PMID: WOS:000332483600015.
- 686 21. DeLeon S, Clinton A, Fowler H, Everett J, Horswill AR, Rumbaugh KP. Synergistic  
687 Interactions of *Pseudomonas aeruginosa* and *Staphylococcus aureus* in an In Vitro Wound  
688 Model. *Infection and Immunity*. 2014;82(11):4718-28. doi: 10.1128/iai.02198-14. PubMed  
689 PMID: WOS:000343582900027.
- 690 22. Rendueles O, Ghigo JM. Multi-species biofilms: how to avoid unfriendly neighbors.  
691 *Fems Microbiology Reviews*. 2012;36(5):972-89. doi: 10.1111/j.1574-6976.2012.00328.x.  
692 PubMed PMID: WOS:000307007700003.
- 693 23. Hotterbeekx A, Xavier BB, Bielen K, Lammens C, Moons P, Schepens T, et al. The  
694 endotracheal tube microbiome associated with *Pseudomonas aeruginosa* or *Staphylococcus*  
695 *epidermidis*. *Scientific Reports*. 2016;6. doi: 10.1038/srep36507. PubMed PMID:  
696 WOS:000387603400002.
- 697 24. Co EM, Keen EF, Aldous WK. Prevalence of Methicillin-Resistant *Staphylococcus*  
698 *aureus* in a Combat Support Hospital in Iraq. *Military Medicine*. 2011;176(1):89-93. PubMed  
699 PMID: WOS:000286015800016.
- 700 25. Keen EF, Robinson BJ, Hospenthal DR, Aldous WK, Wolf SE, Chung KK, et al.  
701 Incidence and bacteriology of burn infections at a military burn center. *Burns*. 2010;36(4):461-8.  
702 doi: 10.1016/j.burns.2009.10.012. PubMed PMID: WOS:000277856300003.
- 703 26. Gomez R, Murray CK, Hospenthal DR, Cancio LC, Renz EM, Holcomb JB, et al. Causes  
704 of Mortality by Autopsy Findings of Combat Casualties and Civilian Patients Admitted to a Burn  
705 Unit. *Journal of the American College of Surgeons*. 2009;208(3):348-54. doi:  
706 10.1016/j.jamcollsurg.2008.11.012. PubMed PMID: WOS:000264260000004.
- 707 27. Martin JM, Zenilman JM, Lazarus GS. Molecular Microbiology: New Dimensions for  
708 Cutaneous Biology and Wound Healing. *Journal of Investigative Dermatology*. 2010;130(1):38-  
709 48. doi: 10.1038/jid.2009.221. PubMed PMID: WOS:000273245700010.
- 710 28. Gjødsbøl K, Christensen JJ, Karlsmark T, Jørgensen B, Klein BM, Kroghfelt KA. Multiple  
711 bacterial species reside in chronic wounds: a longitudinal study 2006; 3(3):[225-31 pp.].
- 712 29. Kirketerp-Møller K, Jensen PO, Fazli M, Madsen KG, Pedersen J, Moser C, et al.  
713 Distribution, organization, and ecology of bacteria in chronic wounds. *Journal of Clinical*

- 714 Microbiology. 2008;46(8):2717-22. doi: 10.1128/jcm.00501-08. PubMed PMID:  
715 WOS:000258908700033.
- 716 30. Duan KM, Dammel C, Stein J, Rabin H, Surette MG. Modulation of *Pseudomonas*  
717 *aeruginosa* gene expression by host microflora through interspecies communication. *Molecular*  
718 *Microbiology*. 2003;50(5):1477-91. doi: 10.1046/j.1365-2958.2003.03803.x. PubMed PMID:  
719 WOS:000186698600003.
- 720 31. Korgaonkar A, Trivedi U, Rumbaugh KP, Whiteley M. Community surveillance  
721 enhances *Pseudomonas aeruginosa* virulence during polymicrobial infection. *Proceedings of the*  
722 *National Academy of Sciences of the United States of America*. 2013;110(3):1059-64. doi:  
723 10.1073/pnas.1214550110. PubMed PMID: WOS:000313909100059.
- 724 32. Sagel SD, Gibson RL, Emerson J, McNamara S, Burns JL, Wagener JS, et al. Impact of  
725 *Pseudomonas* and *Staphylococcus* Infection on Inflammation and Clinical Status in Young  
726 Children with Cystic Fibrosis. *Journal of Pediatrics*. 2009;154(2):183-8. doi:  
727 10.1016/j.jpeds.2008.08.001. PubMed PMID: WOS:000263228300008.
- 728 33. Hauser AR, Jain M, Bar-Meir M, McColley SA. Clinical Significance of Microbial  
729 Infection and Adaptation in Cystic Fibrosis. *Clinical Microbiology Reviews*. 2011;24(1):29-70.  
730 doi: 10.1128/cmr.00036-10. PubMed PMID: WOS:000286178300002.
- 731 34. Foundation CF. Cystic Fibrosis Foundation. 2014.
- 732 35. Leid JG, Willson CJ, Shirliff ME, Hassett DJ, Parsek MR, Jeffers AK. The  
733 Exopolysaccharide Alginate Protects *Pseudomonas aeruginosa* Biofilm Bacteria from IFN- $\gamma$ -  
734 Mediated Macrophage Killing 2005; 175(11):[7512-8 pp.].
- 735 36. Ryder C, Byrd M, Wozniak DJ. Role of polysaccharides in *Pseudomonas aeruginosa*  
736 biofilm development. *Current Opinion in Microbiology*. 2007;10(6):644-8. doi:  
737 10.1016/j.mib.2007.09.010. PubMed PMID: WOS:000251917600021.
- 738 37. Colvin KM, Gordon VD, Murakami K, Borlee BR, Wozniak DJ, Wong GCL, et al. The  
739 Pel Polysaccharide Can Serve a Structural and Protective Role in the Biofilm Matrix of  
740 *Pseudomonas aeruginosa*. *Plos Pathogens*. 2011;7(1). doi: 10.1371/journal.ppat.1001264.  
741 PubMed PMID: WOS:000286654100021.
- 742 38. Colvin KM, Irie Y, Tart CS, Urbano R, Whitney JC, Ryder C, et al. The Pel and Psl  
743 polysaccharides provide *Pseudomonas aeruginosa* structural redundancy within the biofilm  
744 matrix. *Environmental Microbiology*. 2012;14(8):1913-28. doi: 10.1111/j.1462-  
745 2920.2011.02657.x. PubMed PMID: WOS:000306899900009.
- 746 39. Chew SC, Kundukad B, Seviour T, van der Maarel JRC, Yang L, Rice SA, et al.  
747 Dynamic Remodeling of Microbial Biofilms by Functionally Distinct Exopolysaccharides. *Mbio*.  
748 2014;5(4). doi: 10.1128/mBio.01536-14. PubMed PMID: WOS:000341588100014.
- 749 40. Proctor RA, von Eiff C, Kahl BC, Becker K, McNamara P, Herrmann M, et al. Small  
750 colony variants: a pathogenic form of bacteria that facilitates persistent and recurrent infections.  
751 *Nature Reviews Microbiology*. 2006;4(4):295-305. doi: 10.1038/nrmicro1384. PubMed PMID:  
752 WOS:000236040200015.
- 753 41. Mitchell G, Seguin DL, Asselin AE, Deziel E, Cantin AM, Frost EH, et al.  
754 *Staphylococcus aureus* sigma B-dependent emergence of small-colony variants and biofilm  
755 production following exposure to *Pseudomonas aeruginosa* 4-hydroxy-2-heptylquinoline-N-  
756 oxide. *Bmc Microbiology*. 2010;10. doi: 10.1186/1471-2180-10-33. PubMed PMID:  
757 WOS:000274683800002.
- 758 42. Fugere A, Seguin DL, Mitchell G, Deziel E, Dekimpe V, Cantin AM, et al. Interspecific  
759 Small Molecule Interactions between Clinical Isolates of *Pseudomonas aeruginosa* and  
760 *Staphylococcus aureus* from Adult Cystic Fibrosis Patients. *Plos One*. 2014;9(1). doi:  
761 10.1371/journal.pone.0086705. PubMed PMID: WOS:000330288000134.
- 762 43. Hoffman LR, Deziel E, D'Argenio DA, Lepine F, Emerson J, McNamara S, et al.  
763 Selection for *Staphylococcus aureus* small-colony variants due to growth in the presence of  
764 *Pseudomonas aeruginosa*. *Proceedings of the National Academy of Sciences of the United States*

- 765 of America. 2006;103(52):19890-5. doi: 10.1073/pnas.0606756104. PubMed PMID:  
766 WOS:000243285500051.
- 767 44. Biswas L, Biswas R, Schlag M, Bertram R, Gotz F. Small-Colony Variant Selection as a  
768 Survival Strategy for *Staphylococcus aureus* in the Presence of *Pseudomonas aeruginosa*.  
769 Applied and Environmental Microbiology. 2009;75(21):6910-2. doi: 10.1128/aem.01211-09.  
770 PubMed PMID: WOS:000271161700036.
- 771 45. Atalla H, Gyles C, Mallard B. *Staphylococcus aureus* small colony variants (SCVs) and  
772 their role in disease.2011; 12(1):[33-45 pp.].
- 773 46. Kali A, Bhuvaneshwar DP, Charles MV, Seetha KS. Antibacterial synergy of curcumin  
774 with antibiotics against biofilm producing clinical bacterial isolates2016; 7(3):[93-6 pp.].
- 775 47. Percival SL, Finnegan S, Donelli G, Vuotto C, Rimmer S, Lipsky BA. Antiseptics for  
776 treating infected wounds: Efficacy on biofilms and effect of pH. Critical Reviews in  
777 Microbiology. 2016;42(2):293-309. doi: 10.3109/1040841x.2014.940495. PubMed PMID:  
778 WOS:000371823600010.
- 779 48. Bortolin M, Bidossi A, De Vecchi E, Avveniente M, Drago L. In vitro Antimicrobial  
780 Activity of Chlorquinaldol against Microorganisms Responsible for Skin and Soft Tissue  
781 Infections: Comparative Evaluation with Gentamicin and Fusidic Acid. Frontiers in  
782 Microbiology. 2017;8. doi: 10.3389/fmicb.2017.01039. PubMed PMID:  
783 WOS:000402856700002.
- 784 49. Baidamshina DR, Trizna EY, Holyavka MG, Bogachev MI, Artyukhov VG, Akhatova  
785 FS, et al. Targeting microbial biofilms using Ficin, a nonspecific plant protease. Scientific  
786 Reports. 2017;7. doi: 10.1038/srep46068. PubMed PMID: WOS:000398641900002.
- 787 50. Blackledge MS, Worthington RJ, Melander C. Biologically inspired strategies for  
788 combating bacterial biofilms. Current Opinion in Pharmacology. 2013;13(5):699-706. doi:  
789 10.1016/j.coph.2013.07.004. PubMed PMID: WOS:000326140500004.
- 790 51. Kaplan JB. Biofilm Dispersal: Mechanisms, Clinical Implications, and Potential  
791 Therapeutic Uses. Journal of Dental Research. 2010;89(3):205-18. doi:  
792 10.1177/0022034509359403. PubMed PMID: WOS:000274431100001.
- 793 52. Bayer AS, Park S, Ramos MC, Nast CC, Eftekhari F, Schiller NL. Effects of alginate on  
794 the natural-history and antibiotic-therapy of experimental endocarditis caused by mucoid  
795 *pseudomonas-aeruginosa*. Infection and Immunity. 1992;60(10):3979-85. PubMed PMID:  
796 WOS:A1992JP77900004.
- 797 53. Park JH, Lee JH, Cho MH, Herzberg M, Lee J. Acceleration of protease effect on  
798 *Staphylococcus aureus* biofilm dispersal. Fems Microbiology Letters. 2012;335(1):31-8. doi:  
799 10.1111/j.1574-6968.2012.02635.x. PubMed PMID: WOS:000308582400005.
- 800 54. Izano EA, Amarante MA, Kher WB, Kaplan JB. Differential roles of poly-N-  
801 acetylglucosamine surface polysaccharide and extracellular DNA in *Staphylococcus aureus* and  
802 *Staphylococcus epidermidis* biofilms. Applied and Environmental Microbiology.  
803 2008;74(2):470-6. doi: 10.1128/aem.02073-07. PubMed PMID: WOS:000252453100017.
- 804 55. Donelli G, Francolini I, Romoli D, Guaglianone E, Piozzi A, Raganath C, et al.  
805 Synergistic activity of dispersin B and cefamandole nafate in inhibition of staphylococcal  
806 biofilm growth on polyurethanes. Antimicrobial Agents and Chemotherapy. 2007;51(8):2733-40.  
807 doi: 10.1128/aac.01249-06. PubMed PMID: WOS:000248523700011.
- 808 56. Darouiche RO, Mansouri MD, Gawande PV, Madhyastha S. Antimicrobial and  
809 antibiofilm efficacy of triclosan and DispersinB (R) combination. Journal of Antimicrobial  
810 Chemotherapy. 2009;64(1):88-93. doi: 10.1093/jac/dkp158. PubMed PMID:  
811 WOS:000266962100016.
- 812 57. Selan L, Berlutti F, Passariello C, Comodiballanti MR, Thaller MC. Proteolytic-enzymes  
813 - a new treatment strategy for prosthetic infections. Antimicrobial Agents and Chemotherapy.  
814 1993;37(12):2618-21. PubMed PMID: WOS:A1993MK85300018.

- 815 58. Alkawash MA, Soothill JS, Schiller NL. Alginate lyase enhances antibiotic killing of  
816 mucoid *Pseudomonas aeruginosa* in biofilms. *Apmis*. 2006;114(2):131-8. doi: 10.1111/j.1600-  
817 0463.2006.apm\_356.x. PubMed PMID: WOS:000235840100006.
- 818 59. Alipour M, Suntres ZE, Omri A. Importance of DNase and alginate lyase for enhancing  
819 free and liposome encapsulated aminoglycoside activity against *Pseudomonas aeruginosa*.  
820 *Journal of Antimicrobial Chemotherapy*. 2009;64(2):317-25. doi: 10.1093/jac/dkp165. PubMed  
821 PMID: WOS:000267888800017.
- 822 60. Nijland R, Hall MJ, Burgess JG. Dispersal of Biofilms by Secreted, Matrix Degrading,  
823 Bacterial DNase. *Plos One*. 2010;5(12). doi: 10.1371/journal.pone.0015668. PubMed PMID:  
824 WOS:000285292500035.
- 825 61. Heck R, Stuetz, A., inventor Antimycotic-6-phenyl-2-hexen-4-ynamines 1988.
- 826 62. Lonn-Stensrud J, Landin MA, Benneche T, Petersen FC, Scheie AA. Furanones, potential  
827 agents for preventing *Staphylococcus epidermidis* biofilm infections? *Journal of Antimicrobial*  
828 *Chemotherapy*. 2009;63(2):309-16. doi: 10.1093/jac/dkn501. PubMed PMID:  
829 WOS:000262524700016.
- 830 63. Kayumov AR, Nureeva AA, Trizna EY, Gazizova GR, Bogachev MI, Shtyrilin NV, et al.  
831 New Derivatives of Pyridoxine Exhibit High Antibacterial Activity against Biofilm-Embedded  
832 *Staphylococcus* Cells. *Biomed Research International*. 2015. doi: 10.1155/2015/890968.  
833 PubMed PMID: WOS:000367944100001.
- 834 64. Trizna E, Latypova L, Kurbangalieva A, Bogachev MI, Kayumov A. 2(5H)-Furanone  
835 Derivatives as Inhibitors of Staphylococcal Biofilms. *Bionanoscience*. 2016;6(4):423-6. doi:  
836 10.1007/s12668-016-0258-1. PubMed PMID: WOS:000390587700036.
- 837 65. Sharafutdinov IS, Trizna EY, Baidamshina DR, Ryzhikova MN, Sibgatullina RR,  
838 Khabibrakhmanova AM, et al. Antimicrobial Effects of Sulfonyl Derivative of 2(5H)-Furanone  
839 against Planktonic and Biofilm Associated Methicillin-Resistant and -Susceptible *IT*  
840 *Staphylococcus aureus*. *Frontiers in Microbiology*. 2017;8. doi: 10.3389/fmicb.2017.02246.  
841 PubMed PMID: WOS:000415670800001.
- 842 66. Billings N, Millan MR, Caldara M, Rusconi R, Tarasova Y, Stocker R, et al. The  
843 Extracellular Matrix Component Psl Provides Fast-Acting Antibiotic Defense in *Pseudomonas*  
844 *aeruginosa* Biofilms. *Plos Pathogens*. 2013;9(8). doi: 10.1371/journal.ppat.1003526. PubMed  
845 PMID: WOS:000323888200027.
- 846 67. Sharafutdinov I, Trizna E, Ryzhikova M, Muhametzyanova S, Latypova L,  
847 Kurbangalieva A, et al. The antimicrobial activity of 2 (5H)-furanone derivative on  
848 *Staphylococcus aureus*. *Febs Journal*. 2016;283:200-1. PubMed PMID:  
849 WOS:000383616901225.
- 850 68. Cosgrove SE, Kaye KS, Eliopoulos GM, Carmeli Y. Health and economic outcomes of  
851 the emergence of third-generation cephalosporin resistance in *Enterobacter* species. *Archives of*  
852 *internal medicine*. 2002;162(2):185-90. PubMed PMID: 11802752.
- 853 69. Naicker PR, Karayem K, Hoek KGP, Harvey J, Wasserman E. Biofilm formation in  
854 invasive *Staphylococcus aureus* isolates is associated with the clonal lineage. *Microbial*  
855 *Pathogenesis*. 2016;90:41-9. doi: 10.1016/j.micpath.2015.10.023. PubMed PMID:  
856 WOS:000369125500006.
- 857 70. Kayumov AR, Khakimullina EN, Sharafutdinov IS, Trizna EY, Latypova LZ, Lien HT,  
858 et al. Inhibition of biofilm formation in *Bacillus subtilis* by new halogenated furanones. *Journal*  
859 *of Antibiotics*. 2015;68(5):297-301. doi: 10.1038/ja.2014.143. PubMed PMID:  
860 WOS:000355152800001.
- 861 71. Merritt JH, Kadouri, O'Toole GA. Growing and analyzing static biofilms 2005; Chapter  
862 1 (Unit 1B 1.).
- 863 72. Leclercq R, Canton R, Brown DF, Giske CG, Heisig P, MacGowan AP, et al. EUCAST  
864 expert rules in antimicrobial susceptibility testing. *Clinical microbiology and infection : the*

- 865 official publication of the European Society of Clinical Microbiology and Infectious Diseases.  
866 2013;19(2):141-60. doi: 10.1111/j.1469-0691.2011.03703.x. PubMed PMID: 22117544.  
867 73. Terminology relating to methods for the determination of susceptibility of bacteria to  
868 antimicrobial agents. *Clinical Microbiology and Infection*. 2000;6(9):503-8. doi: 10.1046/j.1469-  
869 0691.2000.00149.x.  
870 74. Bogachev M, Markelov O, Trizna E, Baydamshina D, Zelenikhin P, Murtazina R,  
871 Kayumov A. Fast and Simple Tool for the Quantification of Biofilm-Embedded Cells Sub-  
872 Populations From Fluorescent Microscopic Images. *PlosOne*. 2018; 13 doi:  
873 10.1371/journal.pone.0193267.
